# Supplementary material for: Nitrogen-doped graphene-supported Co/CoNx nanohybrid as a highly efficient electrocatalyst for oxygen reduction reaction in an alkaline medium
Source: Royal Society of Chemistry journal article supplement (doi:10.1039/c4ra10133b), 2014-11-04
Supplement: c4ra10133b1.pdf [file c4ra10133b1.pdf]

## Electronic Supplementary Information

**Nitrogen-doped graphene-supported Co/CoN<sub>x</sub> nanohybrid as a high-efficient electrocatalyst for oxygen reduction reaction in an alkaline medium**

**Yi-shu Wang,<sup>a</sup> Bo-wen Zhang,<sup>a</sup> Yong-feng Li,<sup>a</sup> Da-jun Liu,<sup>a</sup> Xing-quan He<sup>\*a</sup>  
Zhen-jun Si<sup>\*b</sup>**

*<sup>a</sup>Department of Chemistry and Chemical Engineering, Changchun University of Science and Technology, Changchun 130022, P. R. China.*

*<sup>b</sup>Department of Material Chemistry, Changchun University of Science and Technology, Changchun 130022, P. R. China.*

---

\* Corresponding author. Tel.+86-431-85583430  
E-mail address:hexingquan@hotmail.com (Xing-Quan He);

## Supplementary data

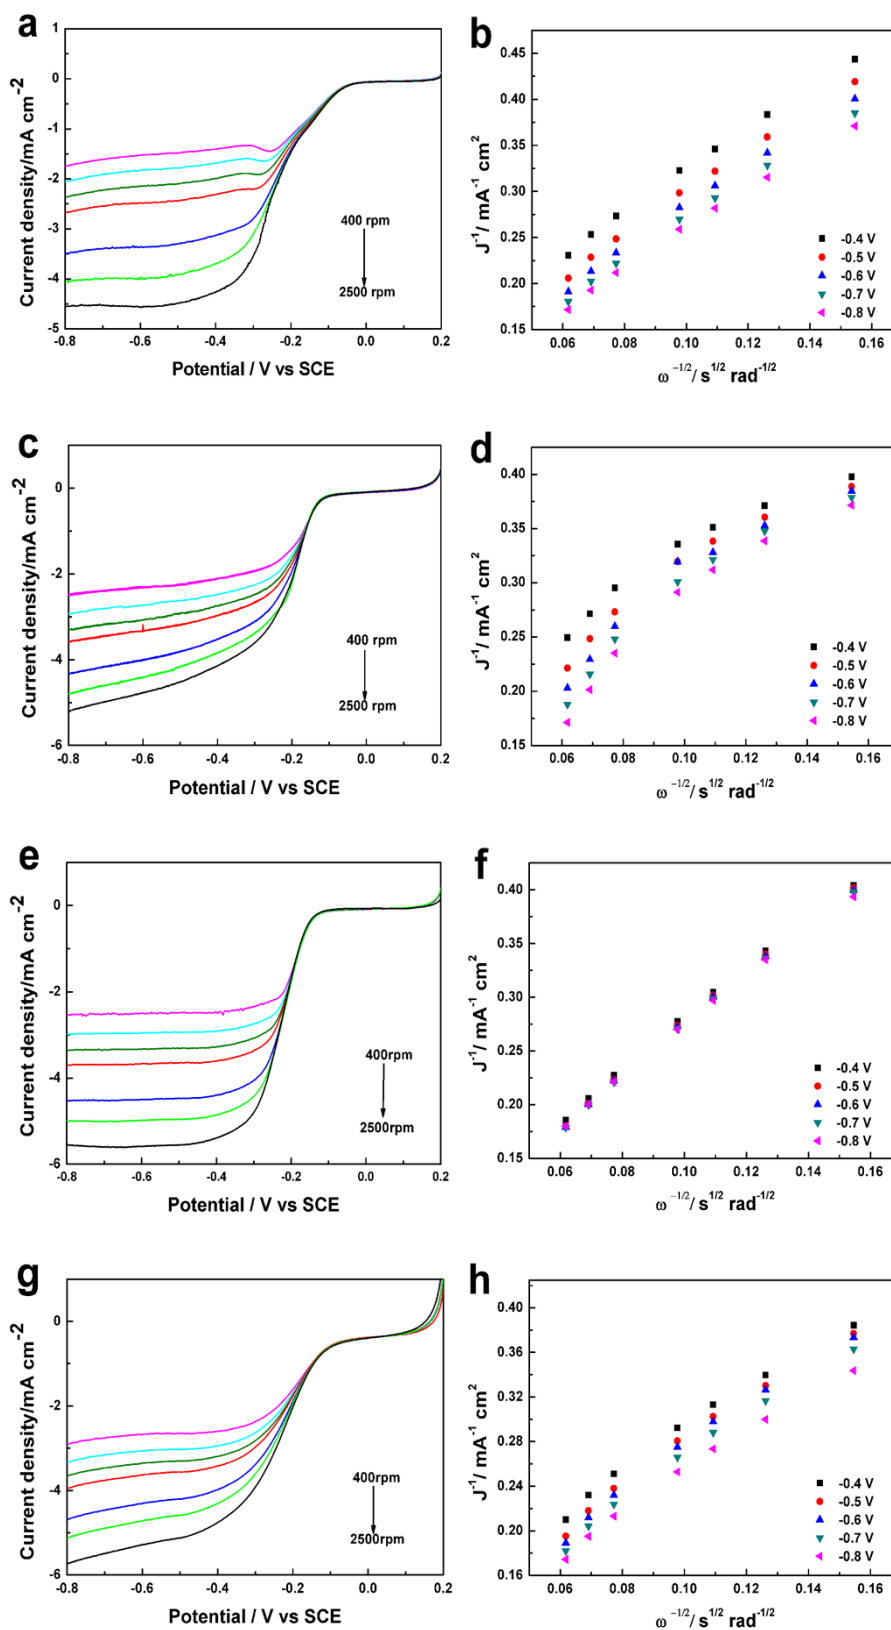

Fig. S1 LSVs for ORR on (a) Co-NG 650, (c) Co-NG 750, (e) Co-NG 950 and (g) NG at different rotation speeds from -0.8 V to +0.2 V vs. SCE in O<sub>2</sub>-saturated 0.1 M KOH at a scan rate of 10 mV s<sup>-1</sup>. The corresponding K-L plots for (b) Co-NG 650, (d) Co-NG 750, (f) Co-NG 950 and (h) NG at different potentials.

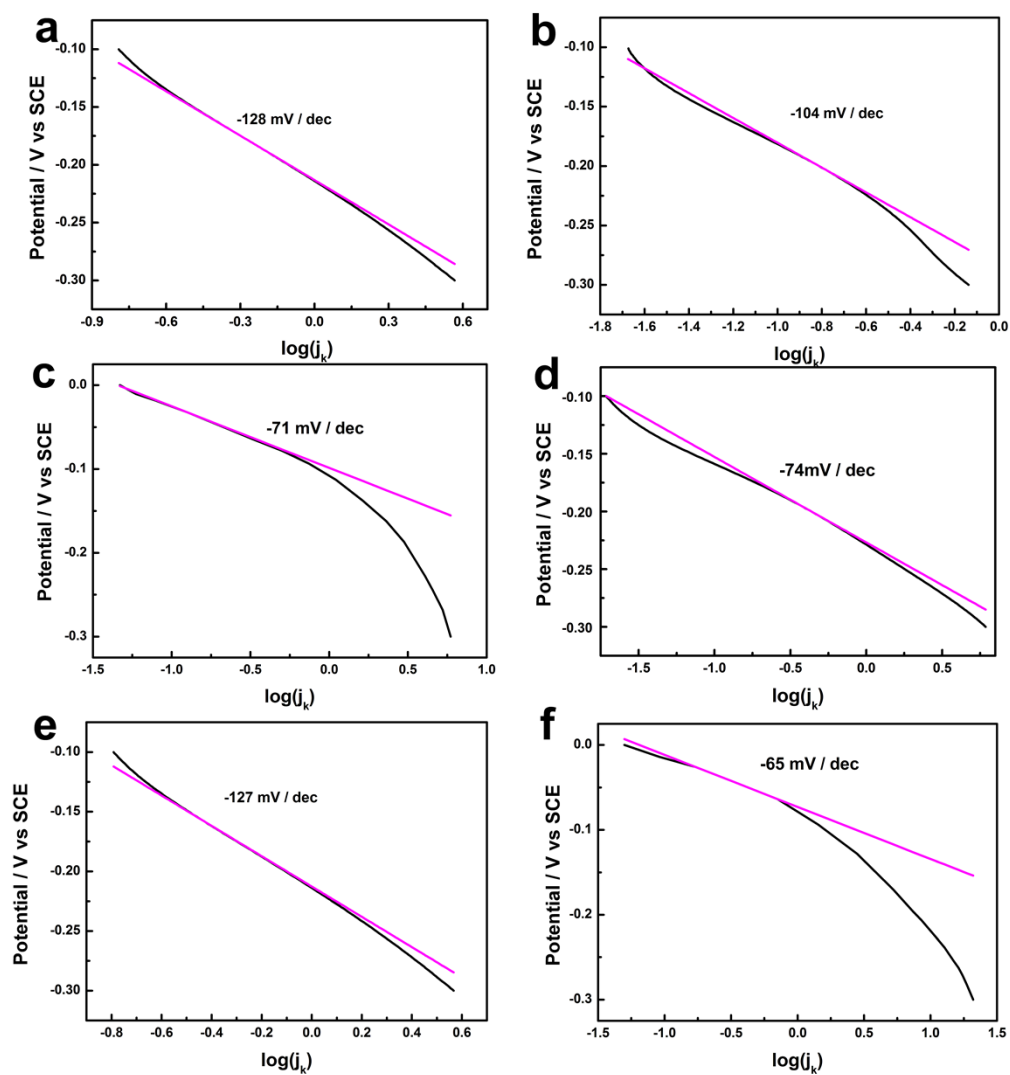

Fig. S2 Tafel plots of Co-NG650, Co-NG750, Co-NG850, Co-NG950, NG and Pt/C derived by the mass-transport correction of corresponding RDE data.
